# Supplementary material for: Equal tibial component fixation of a mobile-bearing and fixed-bearing medial unicompartmental knee arthroplasty: a randomized controlled RSA study with 2-year follow-up
Source: PubMed Central journal article supplement (PMC6844442; doi:10.1080/17453674.2019.1639965), 2019-07-11
Supplement: IORT_A_1639965_SM0702.pdf [file IORT_A_1639965_SM0702.pdf]

## Supplementary data

Table 1. RSA measurement repeatability of the tibial component (MB UKA and FB UKA combined) (n = 55)

| Factor             | Translations (mm) |       |       | Rotations (°) |       |       |
|--------------------|-------------------|-------|-------|---------------|-------|-------|
|                    | x                 | y     | z     | x             | y     | z     |
| Mean difference    | 0.01              | 0.00  | 0.01  | 0.00          | 0.03  | 0.03  |
| SD of difference   | 0.05              | 0.03  | 0.09  | 0.18          | 0.16  | 0.14  |
| PI (1.96 x SD)     | 0.1               | 0.07  | 0.18  | 0.36          | 0.32  | 0.27  |
| Minimum difference | -0.19             | -0.14 | -0.21 | -0.38         | -0.72 | -0.42 |
| Maximum difference | 0.22              | 0.05  | 0.37  | 0.71          | 0.31  | 0.44  |

Table 2. RSA measurement repeatability of the femoral component (MB UKA and FB UKA combined) (n = 37)

| Factor             | Translations (mm) |       |       | Rotations (°) |       |       |
|--------------------|-------------------|-------|-------|---------------|-------|-------|
|                    | x                 | y     | z     | x             | y     | z     |
| Mean difference    | 0.03              | 0.00  | 0.02  | 0.00          | 0.05  | 0.12  |
| SD of difference   | 0.11              | 0.05  | 0.19  | 0.29          | 0.28  | 0.39  |
| PI (1.96 x SD)     | 0.21              | 0.09  | 0.37  | 0.57          | 0.54  | 0.77  |
| Minimum difference | -0.25             | -0.07 | -0.78 | -0.61         | -0.51 | -1.03 |
| Maximum difference | 0.30              | 0.18  | 0.27  | 0.91          | 0.89  | 0.80  |

Table 4. Translations along and rotations about the x-, y-, and z-axis for the tibial component (mean and CI)

|                | MB UKA                 | FB UKA                 |
|----------------|------------------------|------------------------|
| <b>Tx (mm)</b> |                        |                        |
| 4 months       | 0.06 (0.02 to 0.11)    | 0.03 (-0.01 to 0.08)   |
| 12 months      | 0.09 (0.03 to 0.15)    | 0.04 (-0.02 to 0.10)   |
| 24 months      | 0.08 (0.03 to 0.13)    | 0.05 (-0.00 to 0.10)   |
| <b>Ty (mm)</b> |                        |                        |
| 4 months       | 0.01 (-0.02 to 0.04)   | 0.00 (-0.03 to 0.03)   |
| 12 months      | 0.03 (-0.01 to 0.06)   | 0.04 (-0.00 to 0.08)   |
| 24 months      | 0.06 (0.02 to 0.10)    | 0.04 (-0.00 to 0.08)   |
| <b>Tz (mm)</b> |                        |                        |
| 4 months       | -0.08 (-0.16 to -0.01) | 0.00 (-0.07 to 0.08)   |
| 12 months      | -0.11 (-0.20 to -0.01) | 0.03 (-0.07 to 0.12)   |
| 24 months      | -0.08 (-0.16 to -0.01) | 0.03 (-0.04 to 0.11)   |
| <b>Rx (°)</b>  |                        |                        |
| 4 months       | -0.19 (-0.36 to -0.01) | 0.02 (-0.15 to 0.20)   |
| 12 months      | -0.37 (-0.59 to -0.16) | -0.19 (-0.40 to 0.03)  |
| 24 months      | -0.49 (-0.67 to -0.31) | -0.28 (-0.46 to -0.11) |
| <b>Ry (°)</b>  |                        |                        |
| 4 months       | 0.04 (-0.17 to 0.24)   | -0.17 (-0.38 to 0.04)  |
| 12 months      | 0.02 (-0.19 to 0.24)   | -0.28 (-0.50 to -0.07) |
| 24 months      | 0.02 (-0.20 to 0.24)   | -0.25 (-0.47 to -0.03) |
| <b>Rz (°)</b>  |                        |                        |
| 4 months       | -0.10 (-0.22 to 0.02)  | -0.03 (-0.15 to 0.09)  |
| 12 months      | -0.18 (-0.36 to -0.00) | 0.06 (-0.12 to 0.25)   |
| 24 months      | -0.18 (-0.38 to 0.01)  | 0.01 (-0.18 to 0.21)   |

Table 6. Translations along and rotations about the x-, y-, and z-axis for the femoral component (mean and CI)

|                | MB UKA                | FB UKA                 |
|----------------|-----------------------|------------------------|
| <b>Tx (mm)</b> |                       |                        |
| 4 months       | 0.02 (-0.07 to 0.12)  | -0.05 (-0.12 to 0.02)  |
| 12 months      | 0.05 (-0.06 to 0.15)  | -0.05 (-0.13 to 0.02)  |
| 24 months      | -0.02 (-0.12 to 0.07) | -0.06 (-0.13 to 0.00)  |
| <b>Ty (mm)</b> |                       |                        |
| 4 months       | 0.03 (-0.04 to 0.09)  | 0.07 (0.02 to 0.11)    |
| 12 months      | 0.02 (-0.04 to 0.09)  | 0.06 (0.01 to 0.11)    |
| 24 months      | 0.01 (-0.07 to 0.09)  | 0.07 (0.02 to 0.13)    |
| <b>Tz (mm)</b> |                       |                        |
| 4 months       | 0.12 (-0.00 to 0.25)  | 0.05 (-0.04 to 0.14)   |
| 12 months      | 0.15 (0.02 to 0.27)   | 0.02 (-0.07 to 0.11)   |
| 24 months      | 0.15 (0.02 to 0.27)   | 0.01 (-0.08 to 0.11)   |
| <b>Rx (°)</b>  |                       |                        |
| 4 months       | -0.04 (-0.37 to 0.28) | 0.21 (-0.02 to 0.45)   |
| 12 months      | 0.08 (-0.23 to 0.40)  | 0.27 (0.04 to 0.50)    |
| 24 months      | 0.17 (-0.13 to 0.47)  | 0.40 (0.18 to 0.62)    |
| <b>Ry (°)</b>  |                       |                        |
| 4 months       | 0.19 (-0.12 to 0.49)  | 0.38 (0.16 to 0.60)    |
| 12 months      | 0.28 (-0.03 to 0.59)  | 0.42 (0.19 to 0.64)    |
| 24 months      | 0.38 (0.07 to 0.69)   | 0.53 (0.30 to 0.75)    |
| <b>Rz (°)</b>  |                       |                        |
| 4 months       | -0.11 (-0.43 to 0.21) | -0.26 (-0.49 to -0.03) |
| 12 months      | -0.06 (-0.41 to 0.29) | -0.10 (-0.36 to 0.16)  |
| 24 months      | -0.22 (-0.56 to 0.12) | -0.14 (-0.39 to 0.11)  |

Table 5. TT, TR and MTPM for the tibial component, expressed as median (CI) and mean (CI)

|                  | Median (CI)      |                  | Mean (CI)        |                  |
|------------------|------------------|------------------|------------------|------------------|
|                  | MB UKA           | FB UKA           | MB UKA           | FB UKA           |
| <b>TT (mm)</b>   |                  |                  |                  |                  |
| 4 months         | 0.16 (0.12-0.20) | 0.18 (0.13-0.22) | 0.21 (0.15-0.26) | 0.22 (0.16-0.28) |
| 12 months        | 0.20 (0.14-0.25) | 0.18 (0.13-0.23) | 0.26 (0.17-0.35) | 0.25 (0.17-0.34) |
| 24 months        | 0.20 (0.15-0.24) | 0.19 (0.14-0.23) | 0.25 (0.18-0.31) | 0.23 (0.17-0.29) |
| <b>TR (°)</b>    |                  |                  |                  |                  |
| 4 months         | 0.51 (0.37-0.64) | 0.48 (0.35-0.60) | 0.61 (0.41-0.81) | 0.66 (0.46-0.86) |
| 12 months        | 0.59 (0.43-0.75) | 0.60 (0.43-0.76) | 0.76 (0.52-1.01) | 0.80 (0.55-1.05) |
| 24 months        | 0.69 (0.54-0.85) | 0.65 (0.51-0.79) | 0.81 (0.58-1.04) | 0.83 (0.60-1.06) |
| <b>MTPM (mm)</b> |                  |                  |                  |                  |
| 4 months         | 0.35 (0.27-0.43) | 0.36 (0.28-0.44) | 0.42 (0.31-0.53) | 0.44 (0.33-0.55) |
| 12 months        | 0.44 (0.34-0.55) | 0.40 (0.31-0.50) | 0.54 (0.40-0.69) | 0.51 (0.37-0.66) |
| 24 months        | 0.47 (0.37-0.56) | 0.43 (0.34-0.51) | 0.55 (0.43-0.67) | 0.50 (0.38-0.62) |

Table 7. TT, TR and MTPM for the femoral component, expressed as median (CI) and mean (CI)

|            | Median (CI)      |                  | Mean (CI)        |                  |
|------------|------------------|------------------|------------------|------------------|
|            | MB UKA           | FB UKA           | MB UKA           | FB UKA           |
| TT (mm)    |                  |                  |                  |                  |
| 4 months   | 0.21 (0.14–0.29) | 0.25 (0.18–0.29) | 0.21 (0.15–0.26) | 0.22 (0.16–0.28) |
| 12 months  | 0.23 (0.14–0.31) | 0.24 (0.17–0.31) | 0.26 (0.18–0.35) | 0.25 (0.17–0.35) |
| 24 months  | 0.22 (0.14–0.29) | 0.27 (0.20–0.33) | 0.25 (0.18–0.31) | 0.23 (0.17–0.29) |
| TR (°)     |                  |                  |                  |                  |
| 4 months   | 0.50 (0.33–0.67) | 0.96 (0.73–1.20) | 0.61 (0.41–0.81) | 0.66 (0.46–0.86) |
| 12 months  | 0.65 (0.41–0.89) | 0.90 (0.65–1.14) | 0.76 (0.52–1.01) | 0.80 (0.55–1.05) |
| 24 months  | 0.58 (0.36–0.81) | 0.94 (0.67–1.20) | 0.81 (0.58–1.04) | 0.83 (0.60–1.06) |
| MTPM (mm): |                  |                  |                  |                  |
| 4 months   | 0.38 (0.28–0.49) | 0.58 (0.47–0.68) | 0.42 (0.31–0.53) | 0.44 (0.33–0.55) |
| 12 months  | 0.45 (0.32–0.59) | 0.55 (0.43–0.67) | 0.54 (0.40–0.69) | 0.51 (0.37–0.66) |
| 24 months  | 0.42 (0.30–0.53) | 0.61 (0.49–0.74) | 0.55 (0.43–0.67) | 0.50 (0.38–0.62) |

Table 9. RAND-36 summary scores (mean (SD)) over time

|                             | MB UKA  | FB UKA  |
|-----------------------------|---------|---------|
| Physical function           |         |         |
| Preoperative                | 50 (17) | 53 (19) |
| 4 months                    | 74 (17) | 75 (14) |
| 12 months                   | 78 (16) | 82 (11) |
| 24 months                   | 78 (19) | 81 (14) |
| Limitations/physical health |         |         |
| Preoperative                | 37 (39) | 43 (36) |
| 4 months                    | 57 (43) | 67 (40) |
| 12 months                   | 74 (39) | 74 (40) |
| 24 months                   | 74 (40) | 84 (29) |
| Pain                        |         |         |
| Preoperative                | 65 (44) | 72 (38) |
| 4 months                    | 77 (38) | 87 (32) |
| 12 months                   | 85 (36) | 81 (34) |
| 24 months                   | 87 (32) | 91 (23) |
| General health              |         |         |
| Preoperative                | 74 (18) | 75 (14) |
| 4 months                    | 78 (17) | 80 (14) |
| 12 months                   | 73 (18) | 81 (18) |
| 24 months                   | 76 (18) | 81 (19) |

Table 10. Leg extension power (mean and CI) for the operated leg and the contralateral leg

|                         | MB UKA        | FB UKA        |
|-------------------------|---------------|---------------|
| Operated leg (W/kg)     |               |               |
| Preoperative            | 1.5 (1.3–1.7) | 1.7 (1.5–1.8) |
| 4 months                | 1.4 (1.2–1.6) | 1.5 (1.3–1.7) |
| 12 months               | 2.0 (1.8–2.2) | 1.9 (1.6–2.1) |
| 24 months               | 1.8 (1.6–2.0) | 1.9 (1.7–2.1) |
| Non-operated leg (W/kg) |               |               |
| Preoperative            | 1.9 (1.7–2.2) | 2.1 (1.8–2.4) |
| 24 months               | 1.8 (1.6–2.0) | 1.9 (1.6–2.1) |

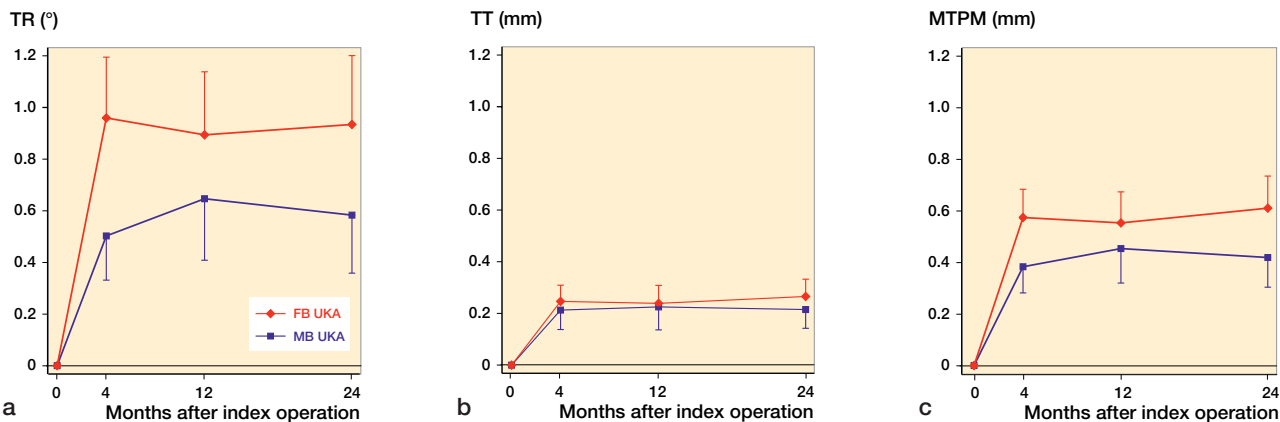

Figure 3. (a) total rotation (TR), (b) total translation (TT), and (c) maximal total point motion (MTPM) for the femoral component (median and CI).
